# Supplementary material for: The G‐protein biased partial κ opioid receptor agonist 6′‐GNTI blocks hippocampal paroxysmal discharges without inducing aversion
Source: PubMed Central journal article supplement (PMC4867738; doi:10.1111/bph.13474), 2016-04-21

Saline

U-50488H

6'-GNTI

Specificity control

A

B

C

D

Zif 268

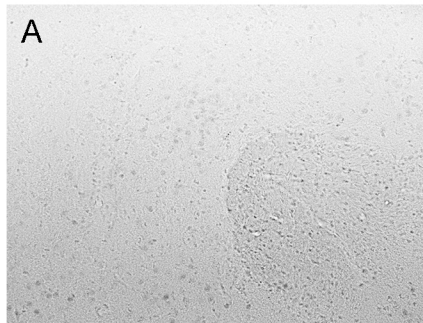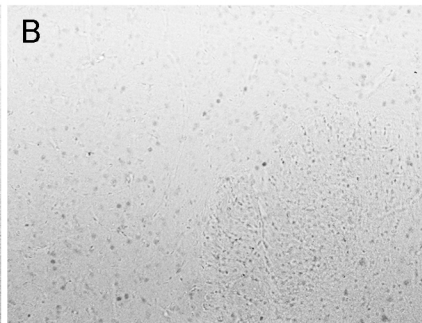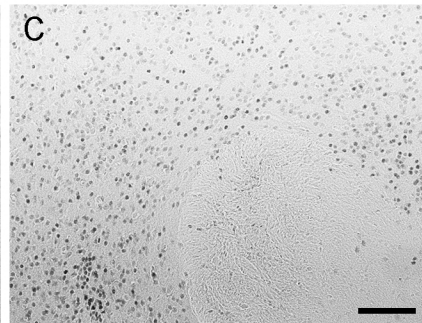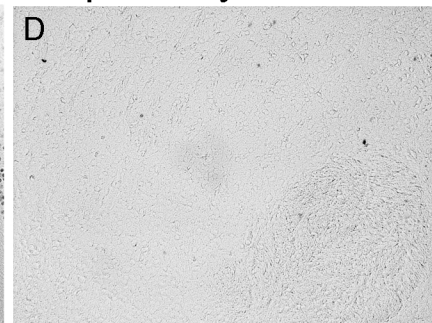

E

F

G

H

pERK 1

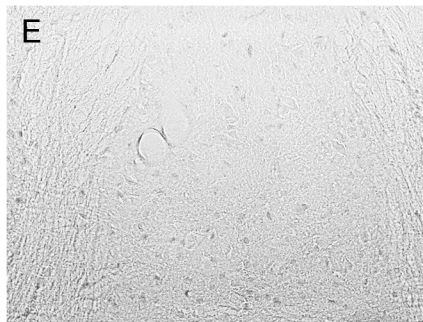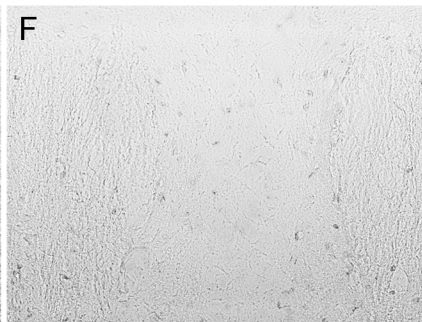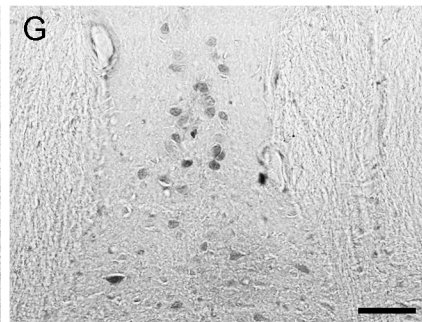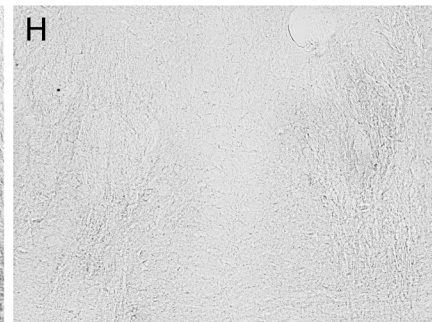

Supplement: BPH-173-1756-s003.pdf [file BPH-173-1756-s003.pdf]
