# Supplementary material for: The G‐protein biased partial κ opioid receptor agonist 6′‐GNTI blocks hippocampal paroxysmal discharges without inducing aversion
Source: PubMed Central journal article supplement (PMC4867738; doi:10.1111/bph.13474), 2016-04-21

Relative time of trains (%)

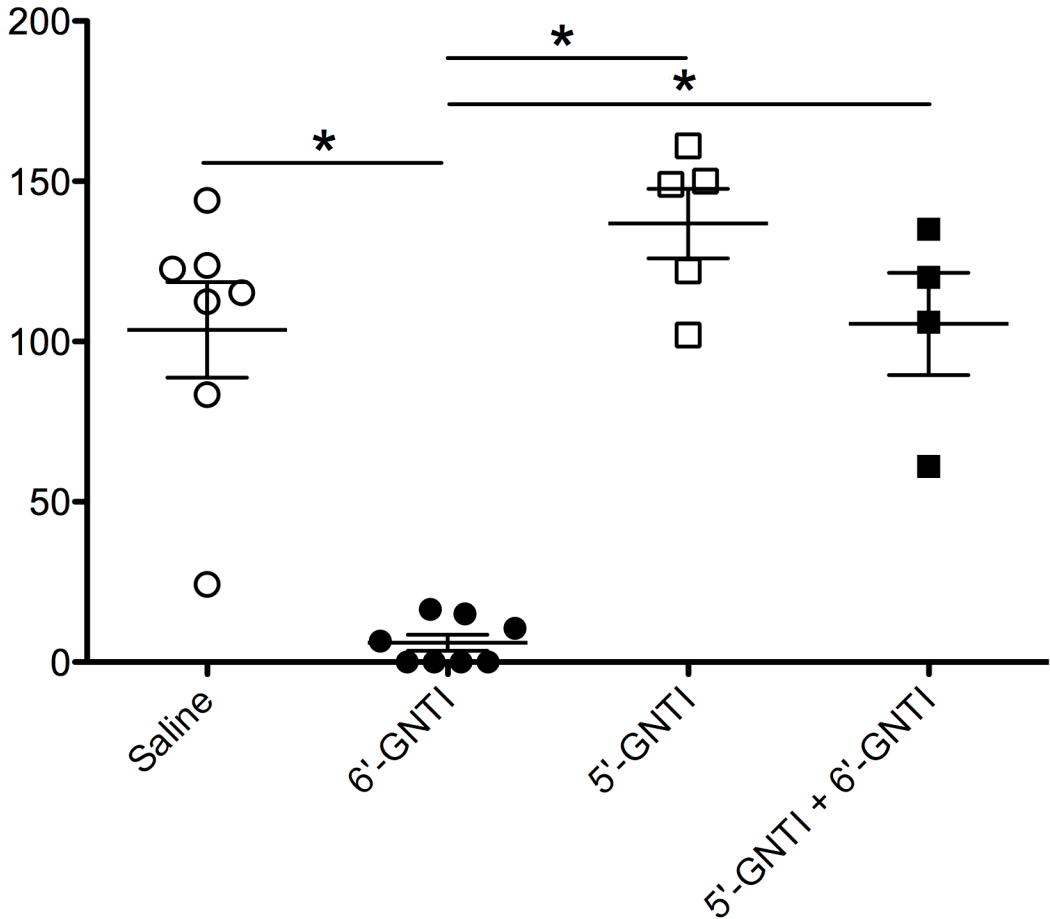

Supplement: BPH-173-1756-s004.pdf [file BPH-173-1756-s004.pdf]
